# Supplementary material for: Evaluation of the Efficacy of the 755 nm Picosecond Laser in Eliminating Pigmented Skin Lesions after a Single Treatment Based on Photographic Analysis with Polarised Light
Source: MDPI journal article supplement (doi:10.3390/jcm13020304), 2024-01-05
Supplement: s1 [file s1]

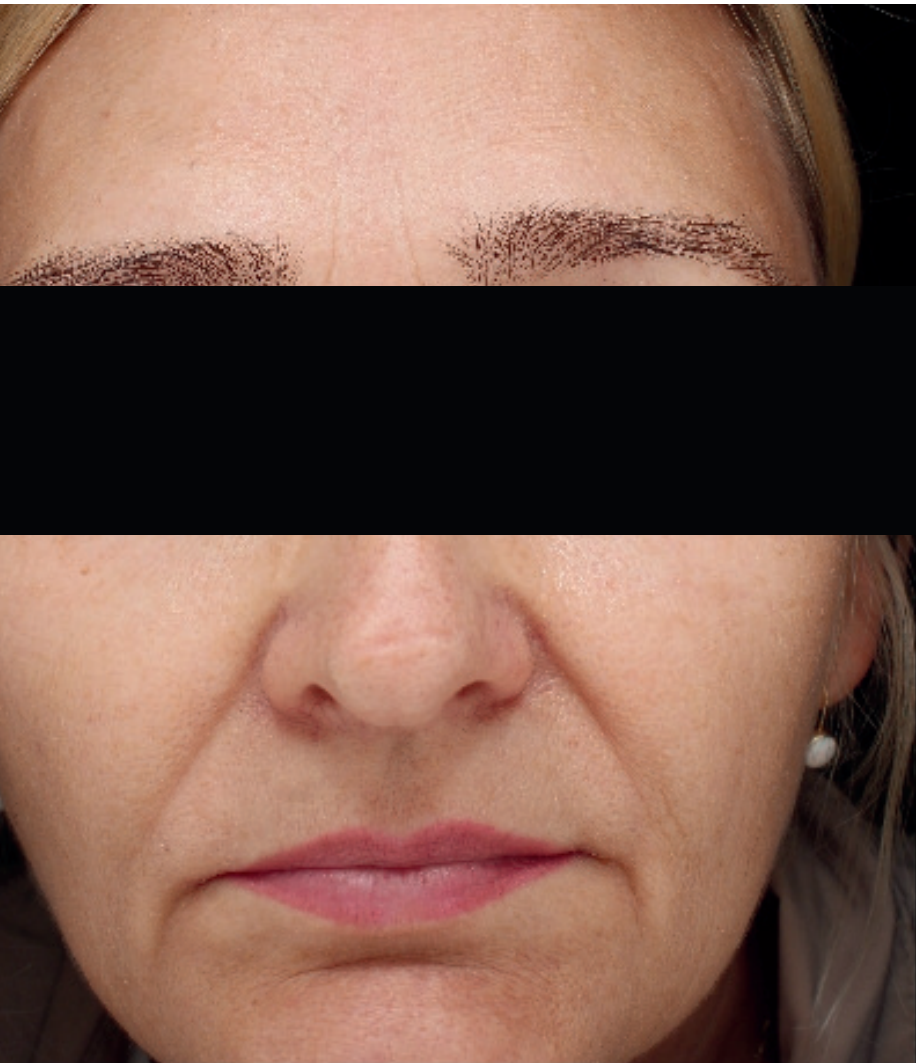

BEFORE TREATMENT

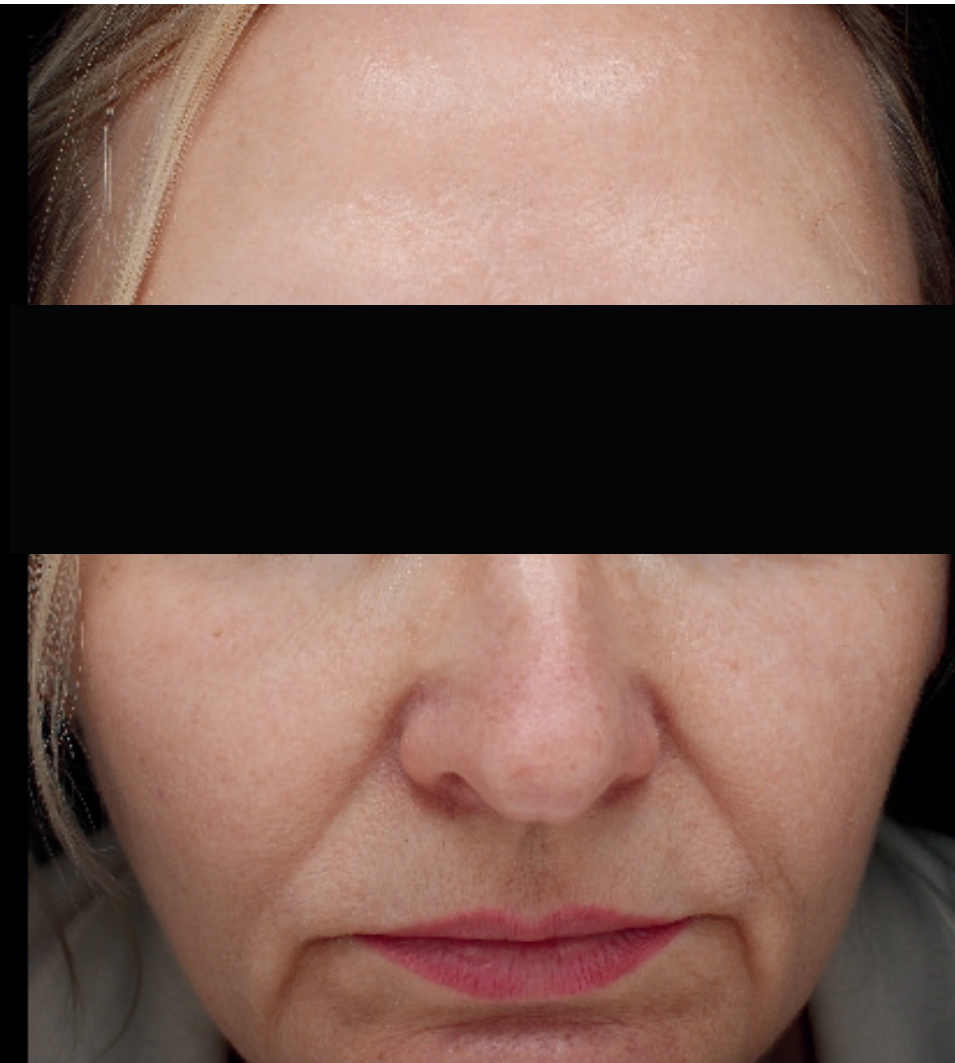

AFTER TREATMENT



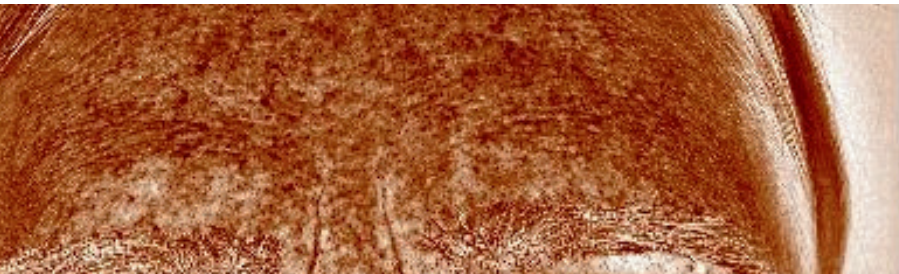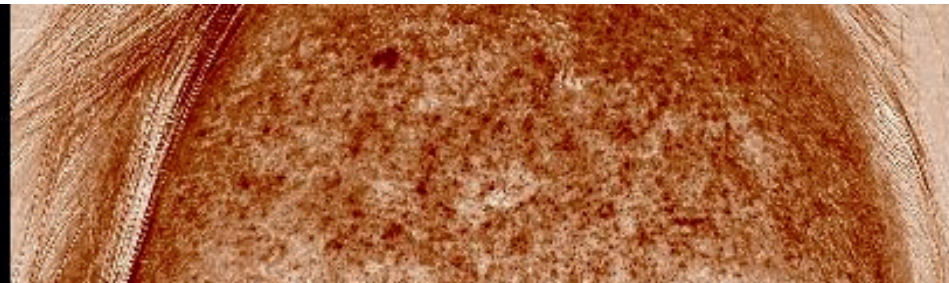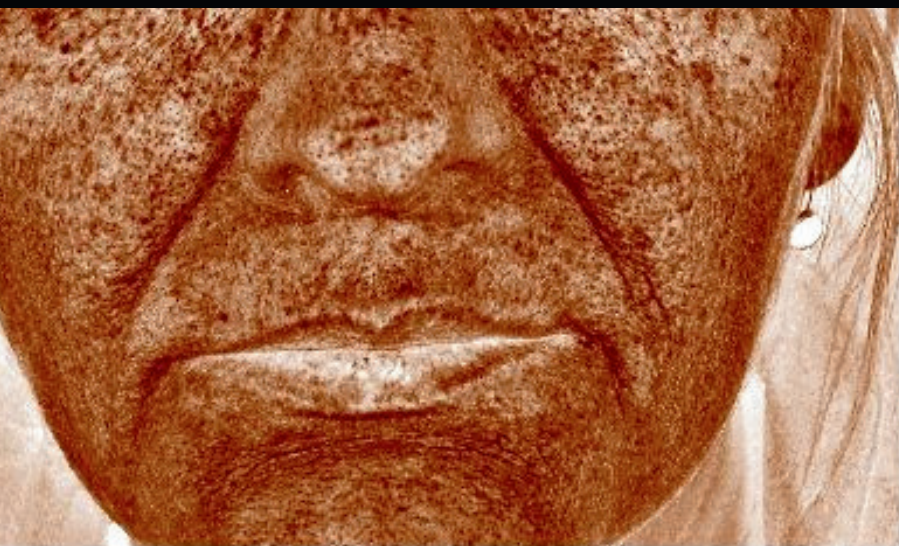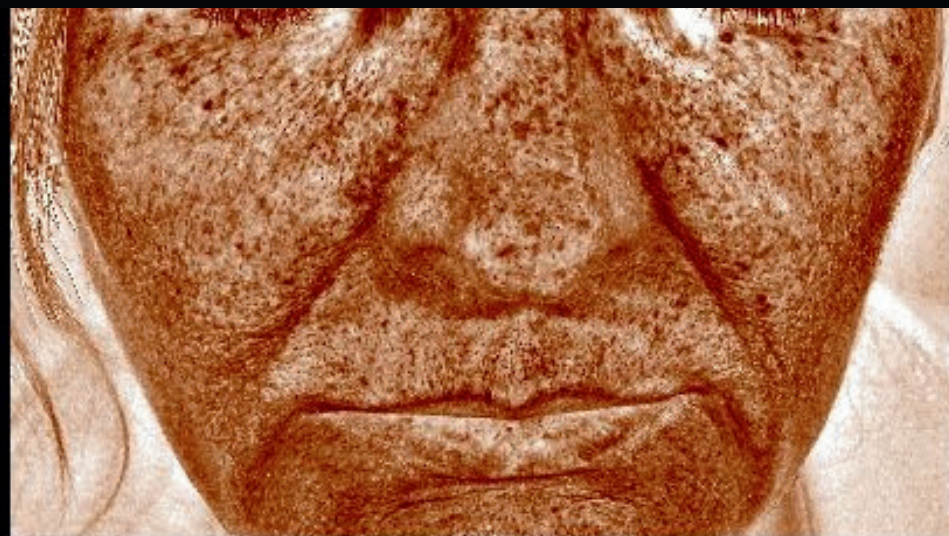

BEFORE TREATMENT

AFTER TREATMENT



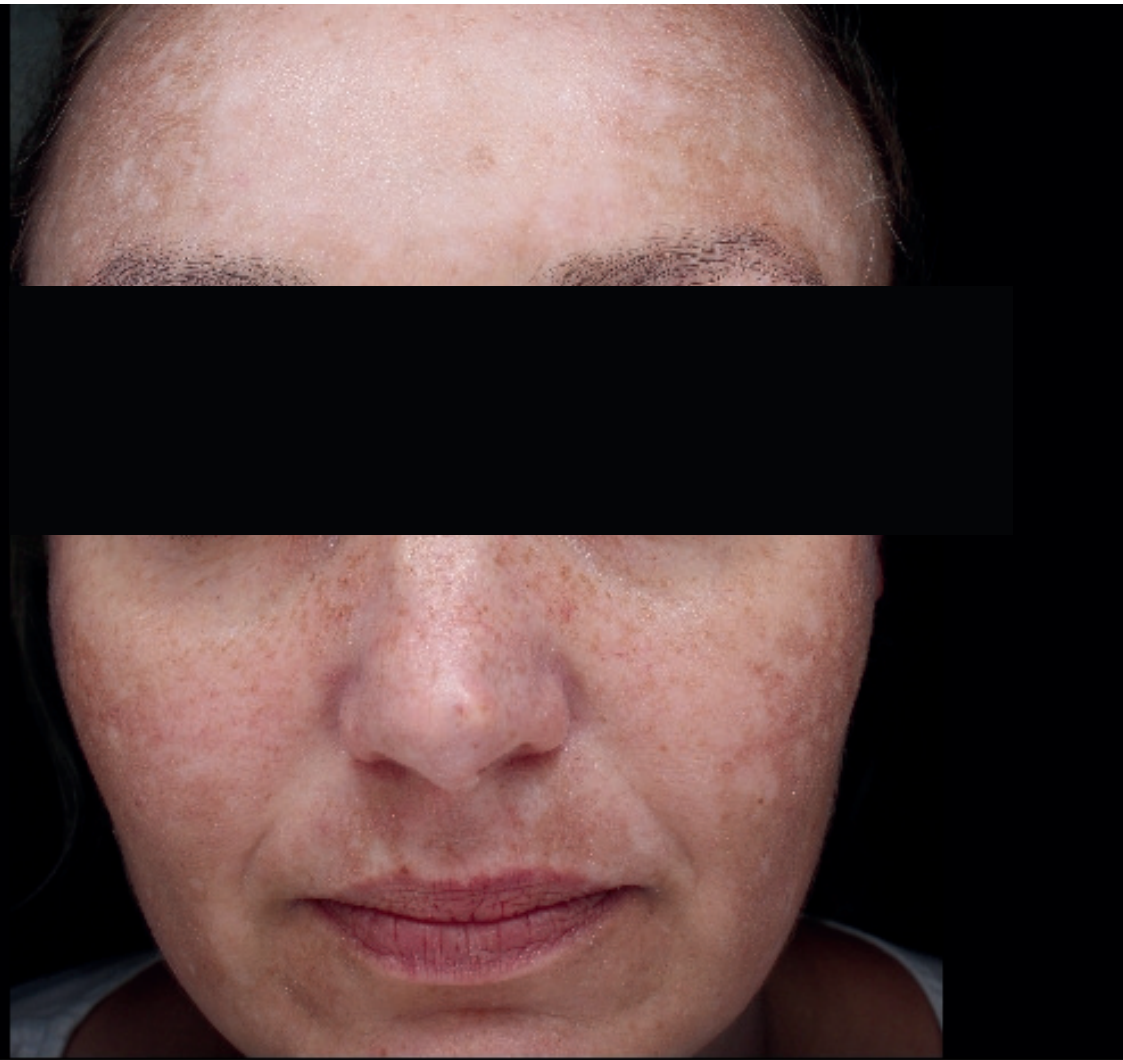

BEFORE TREATMENT

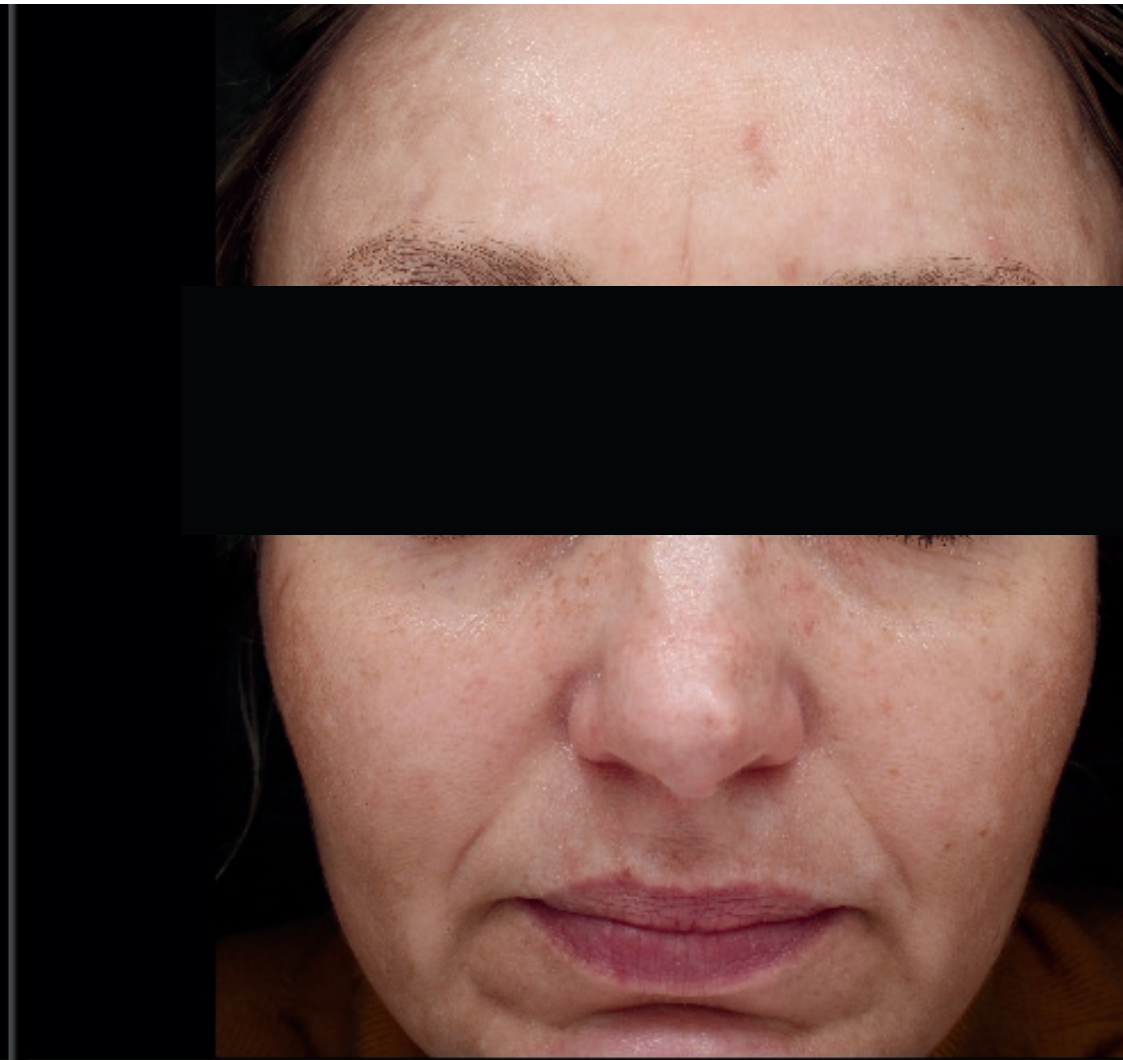

AFTER TREATMENT

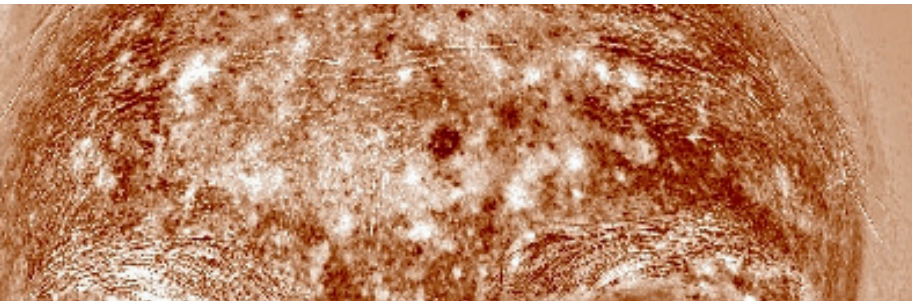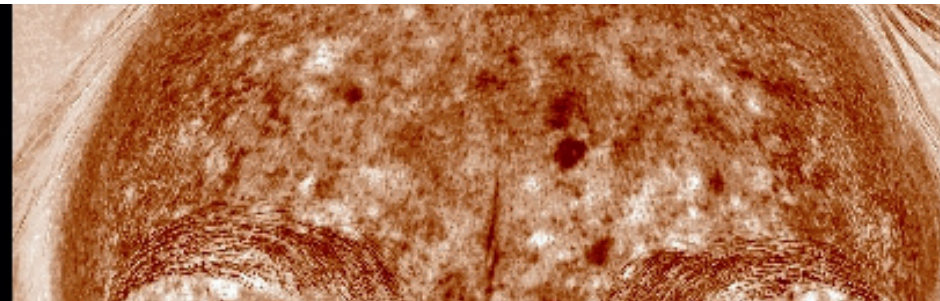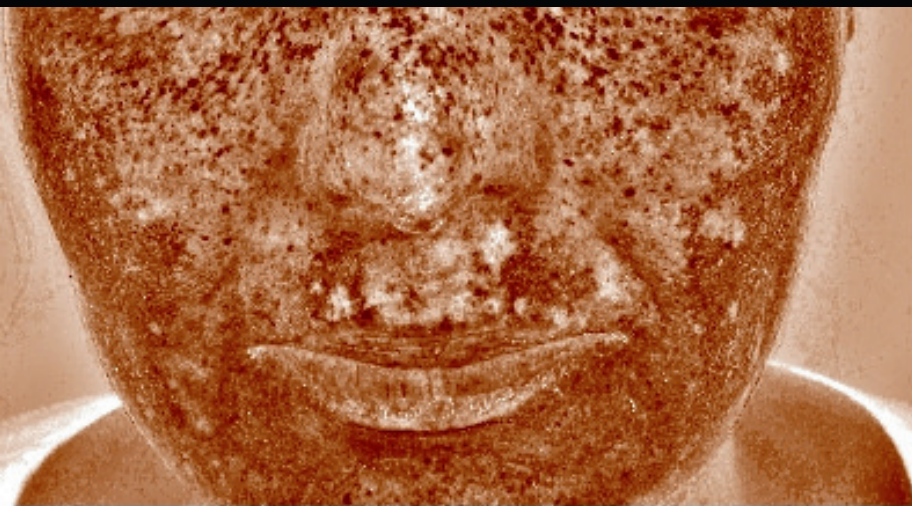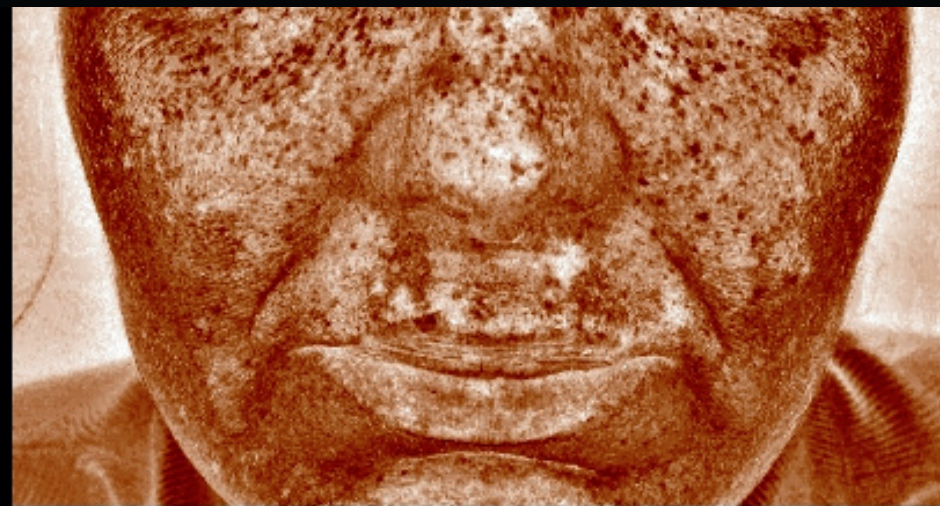

BEFORE TREATMENT

AFTER TREATMENT



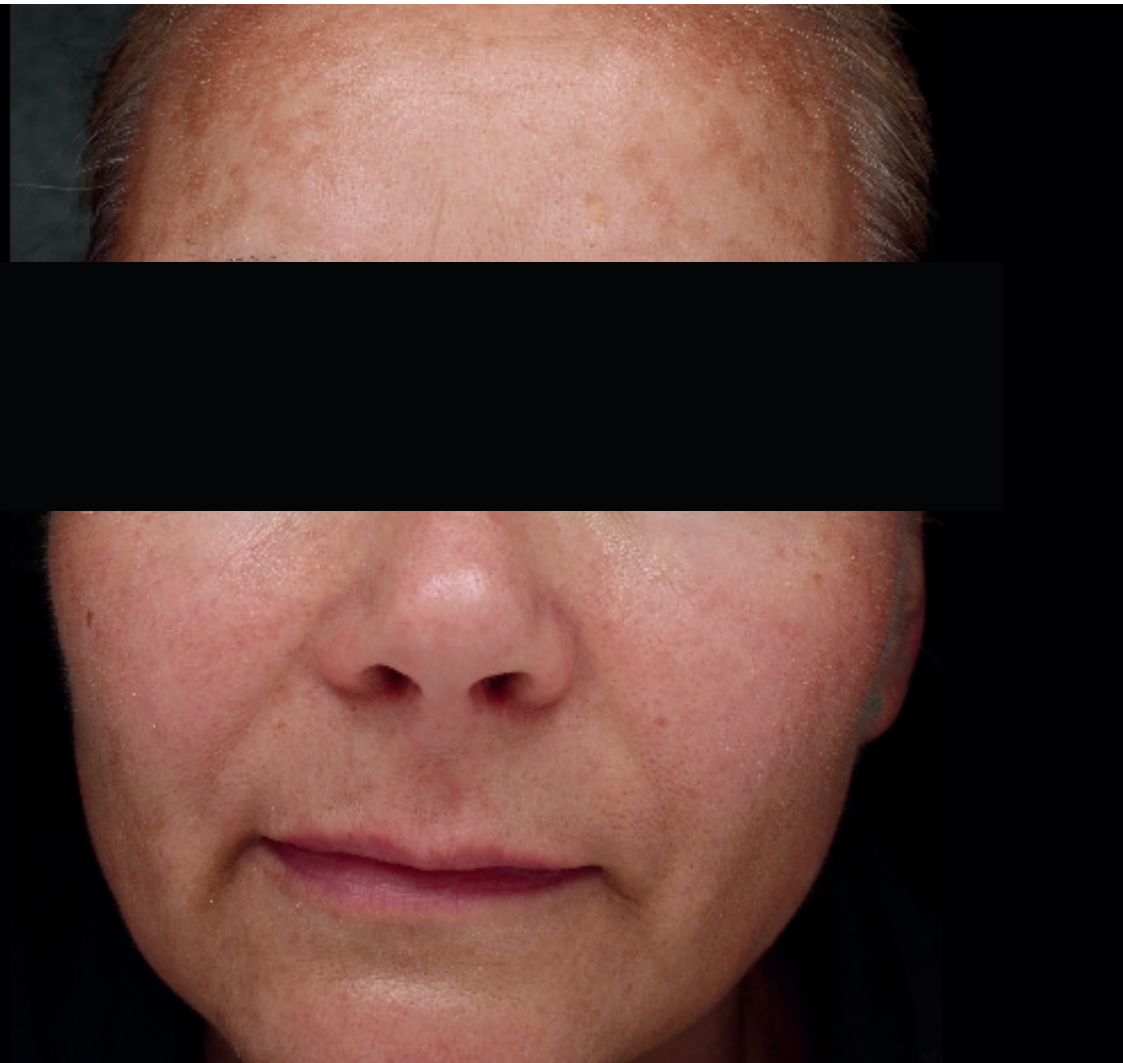

BEFORE TREATMENT

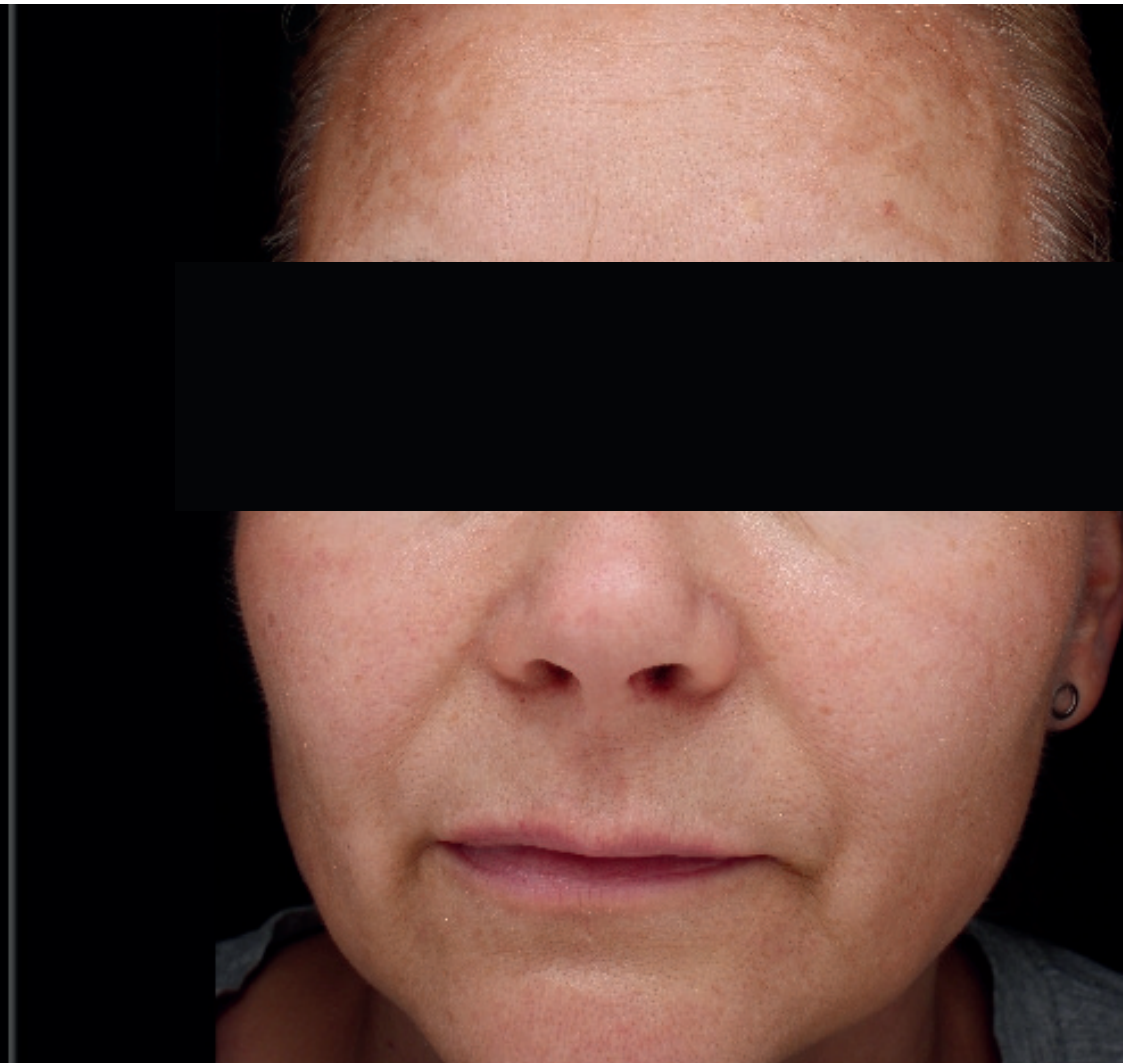

AFTER TREATMENT



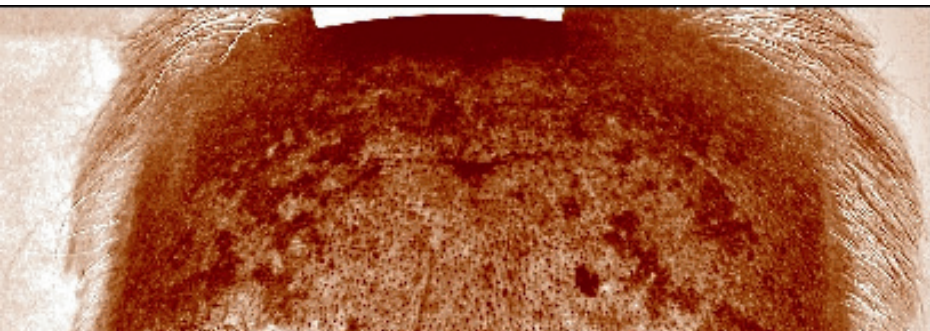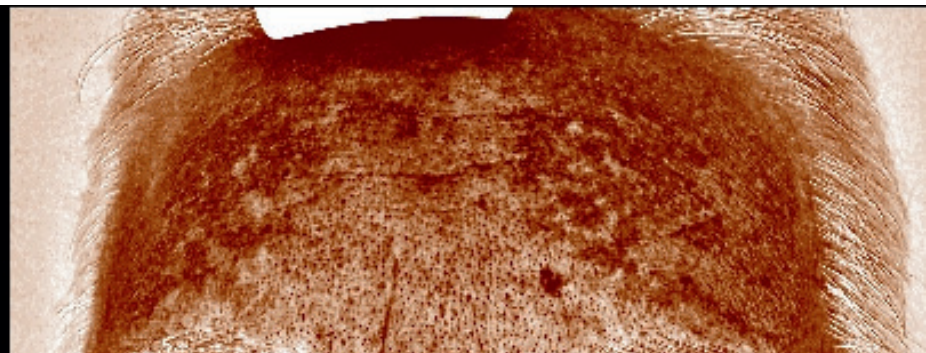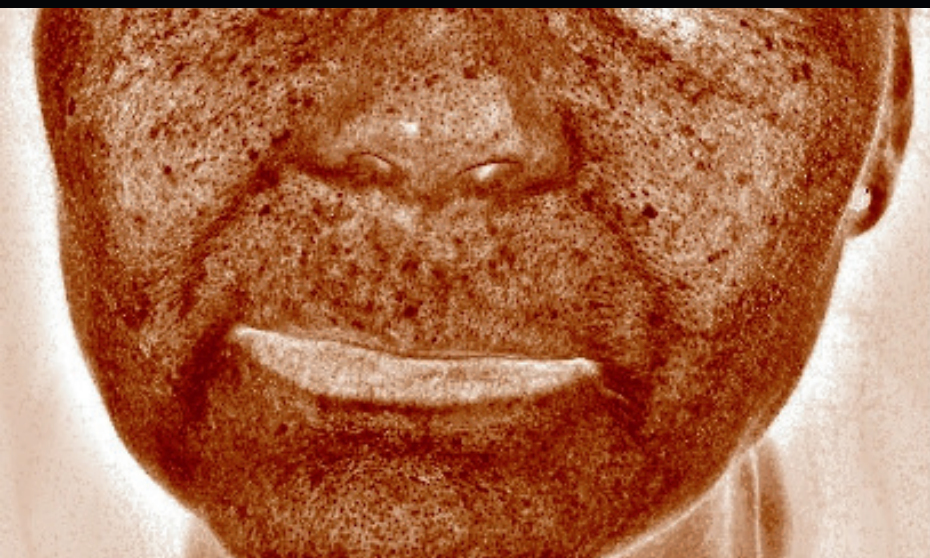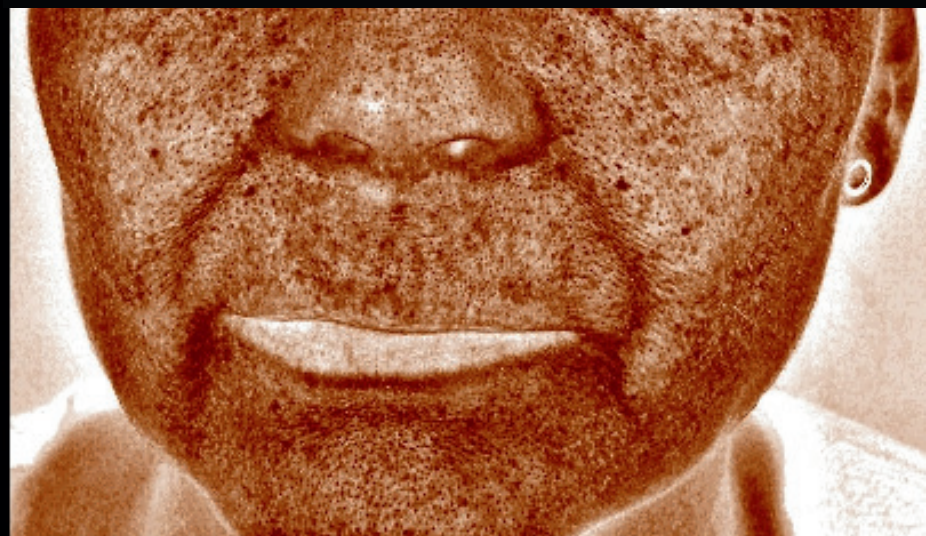

BEFORE TREATMENT

AFTER TREATMENT



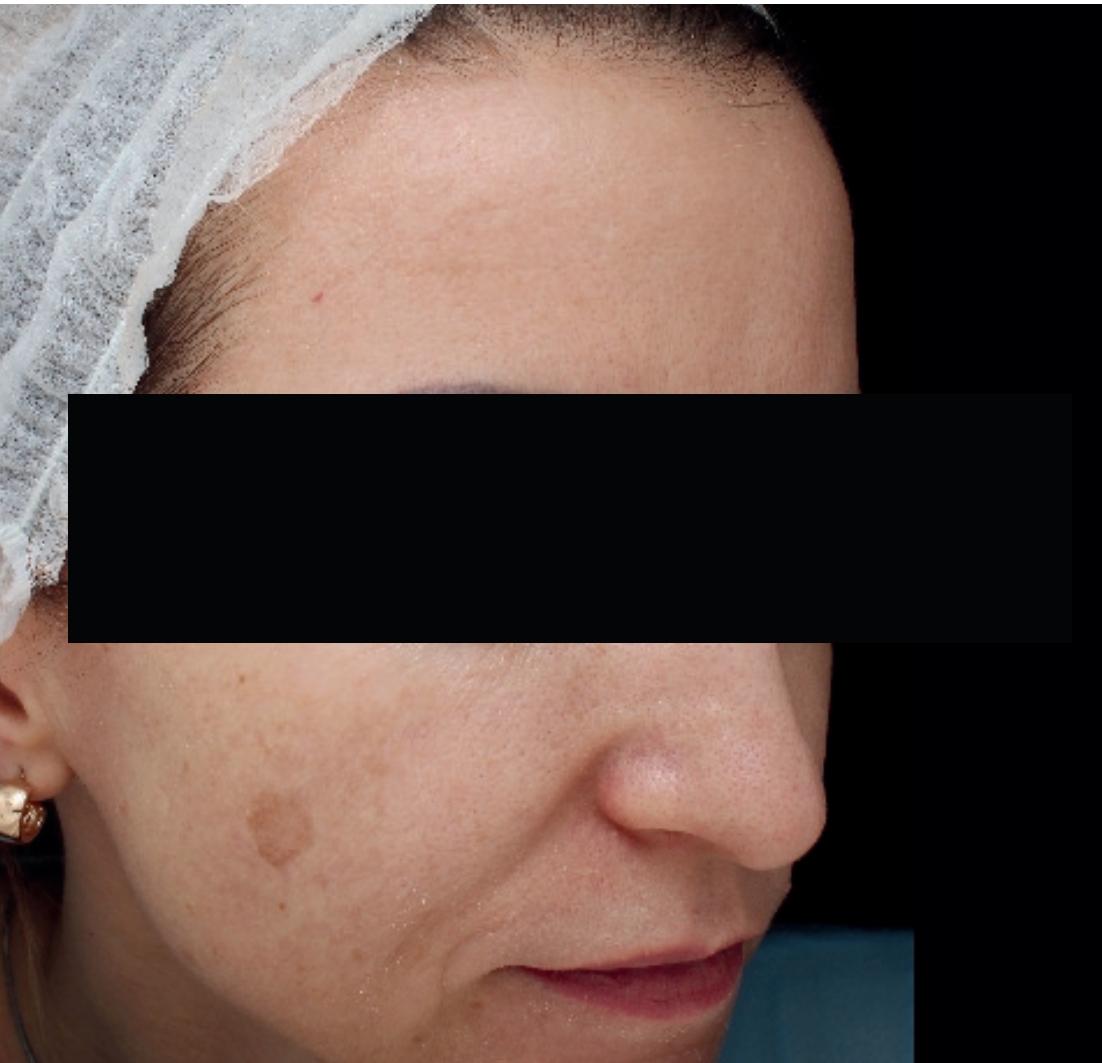

BEFORE TREATMENT

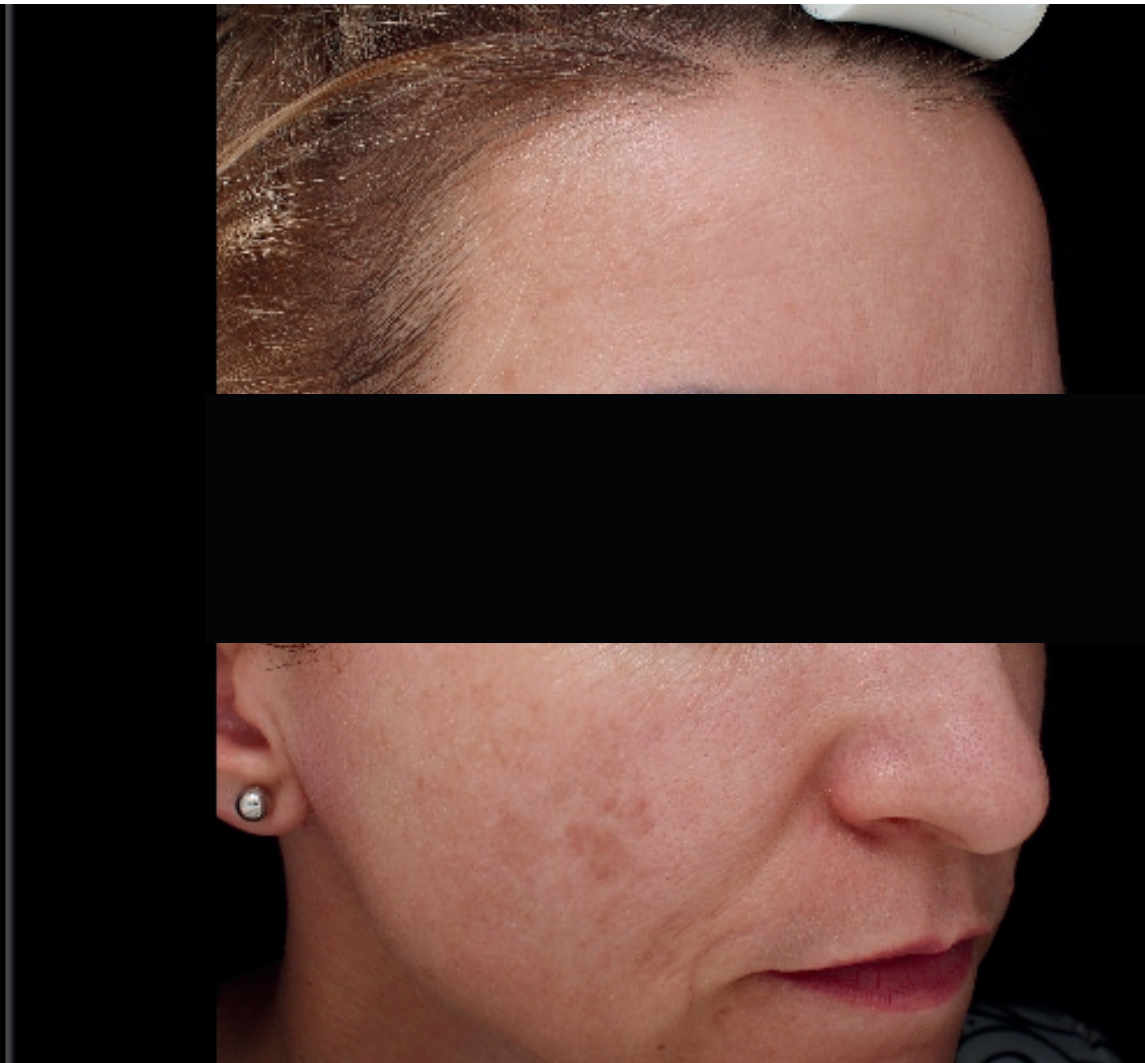

AFTER TREATMENT

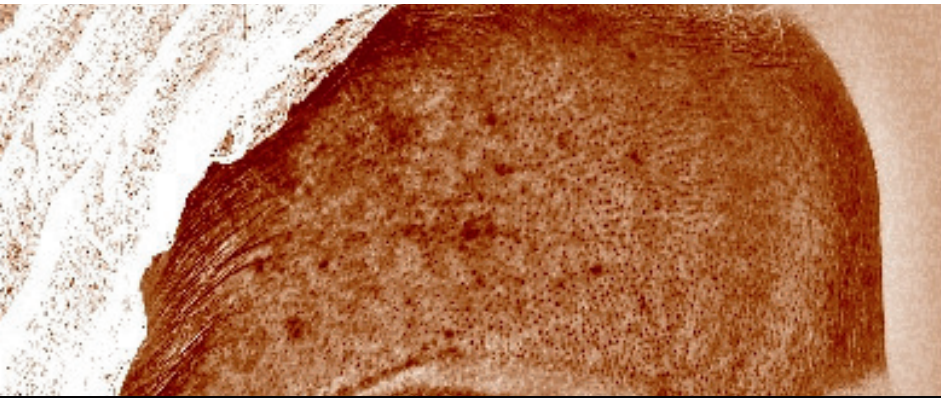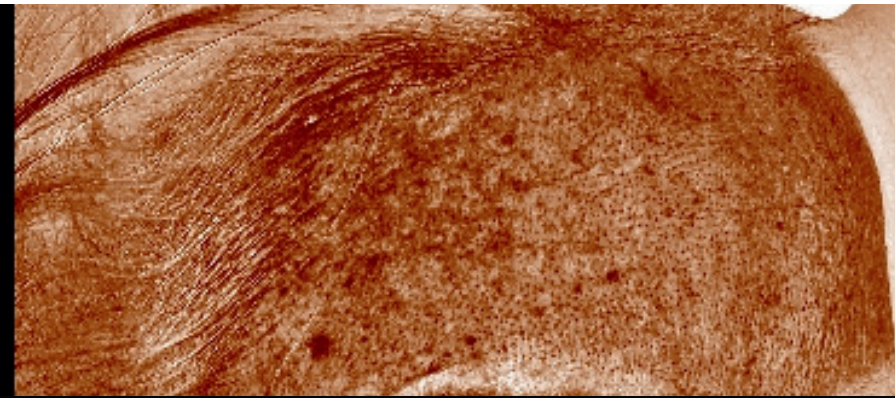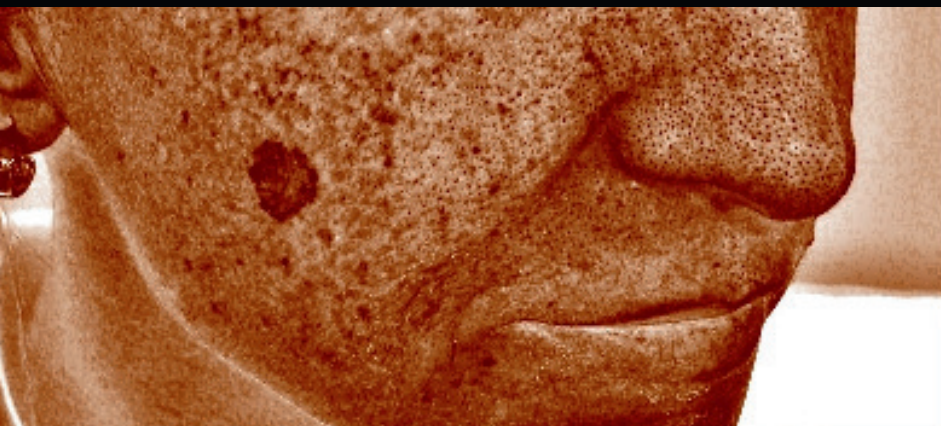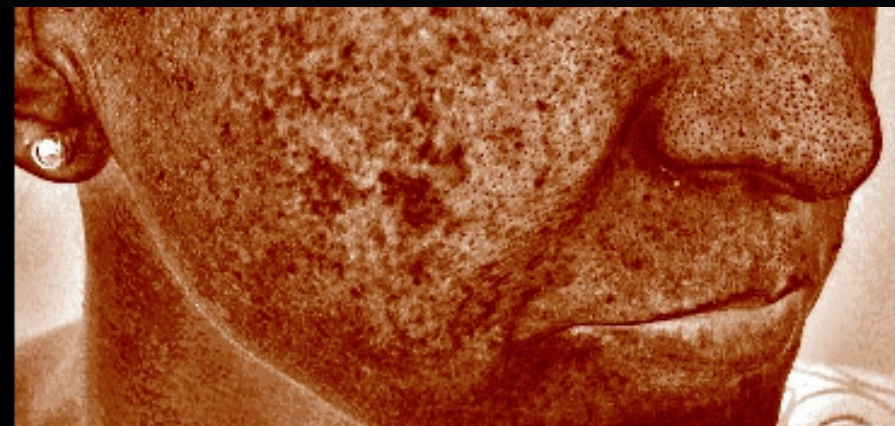

BEFORE TREATMENT

AFTER TREATMENT



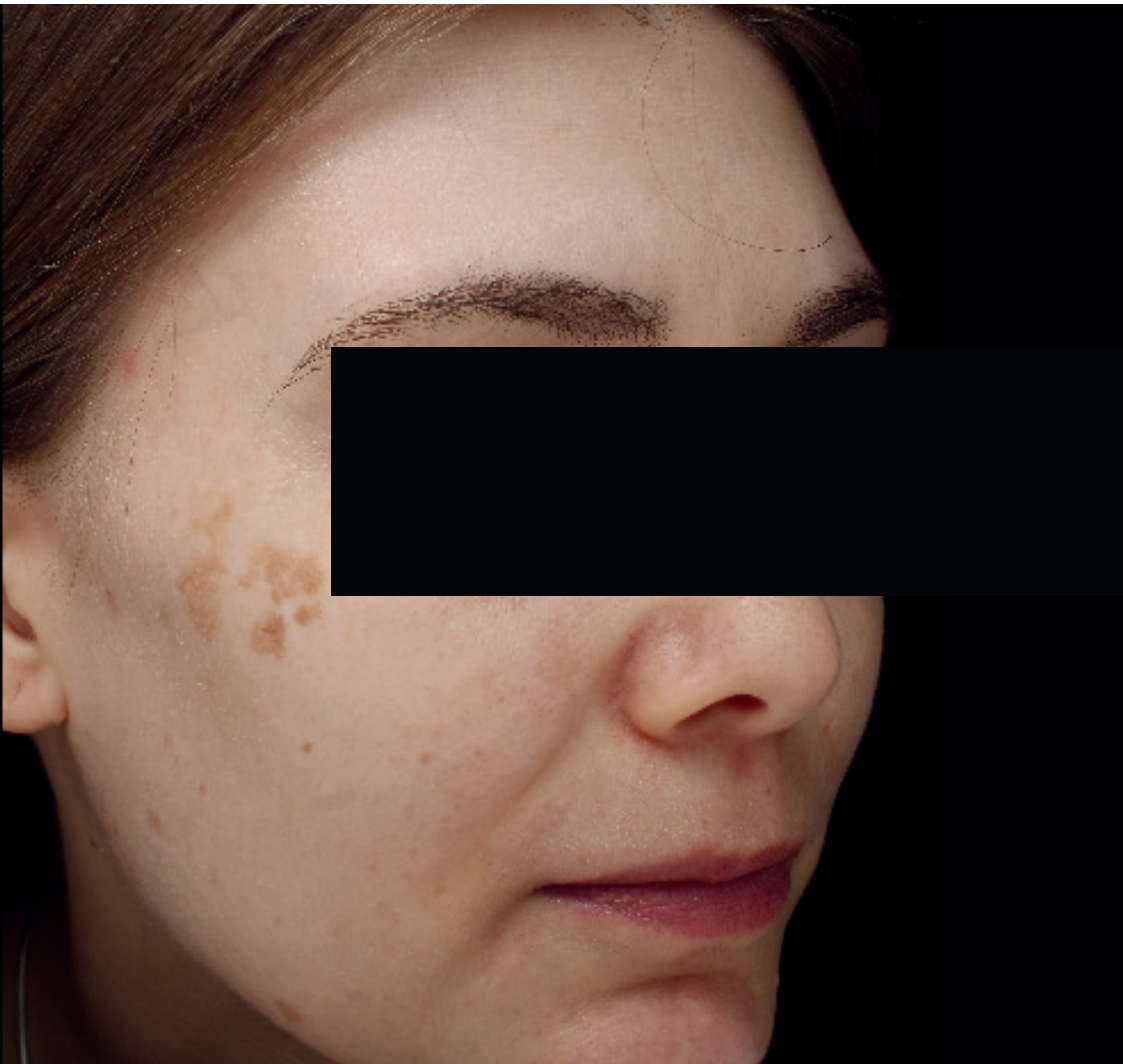

BEFORE TREATMENT

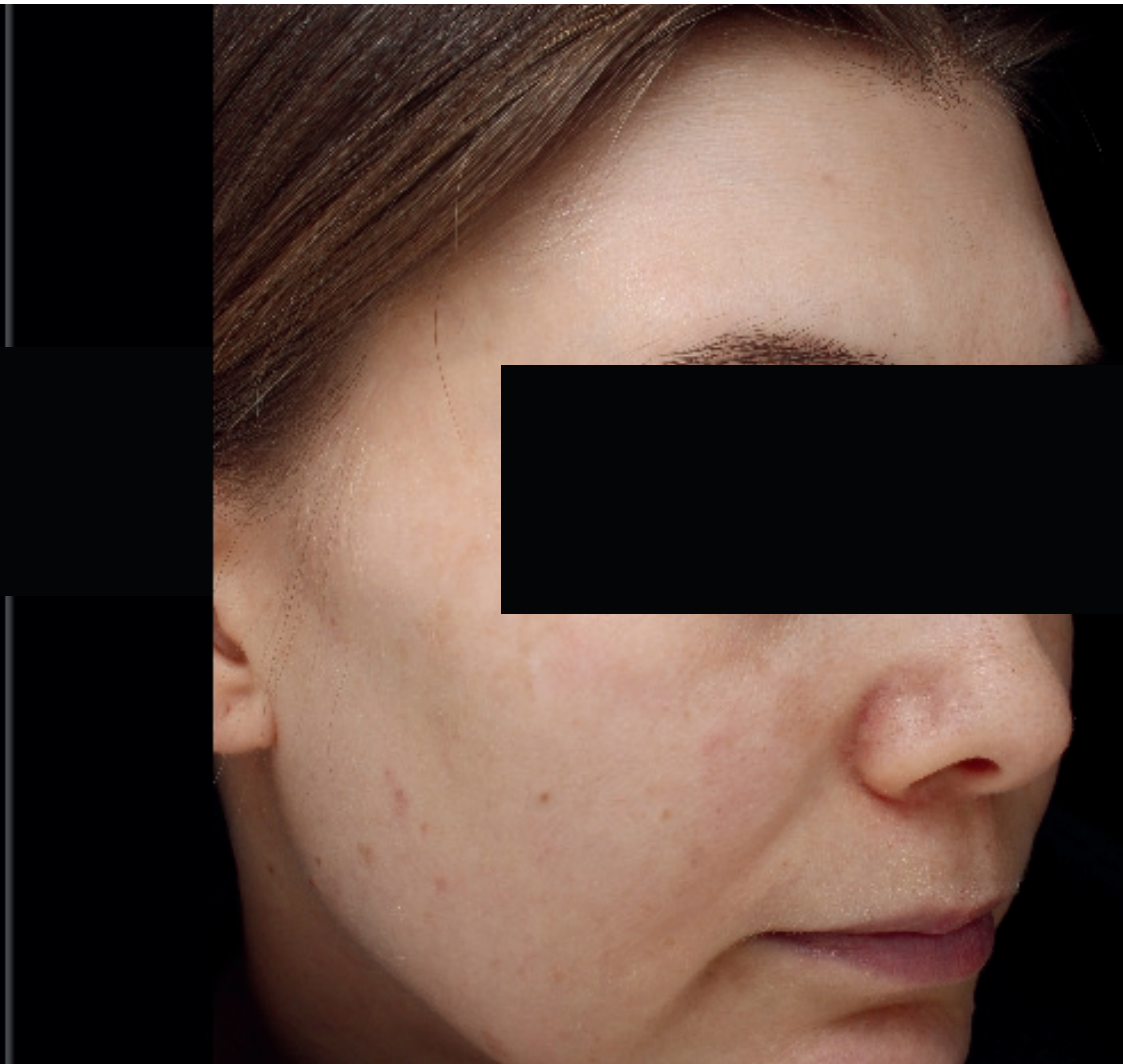

AFTER TREATMENT



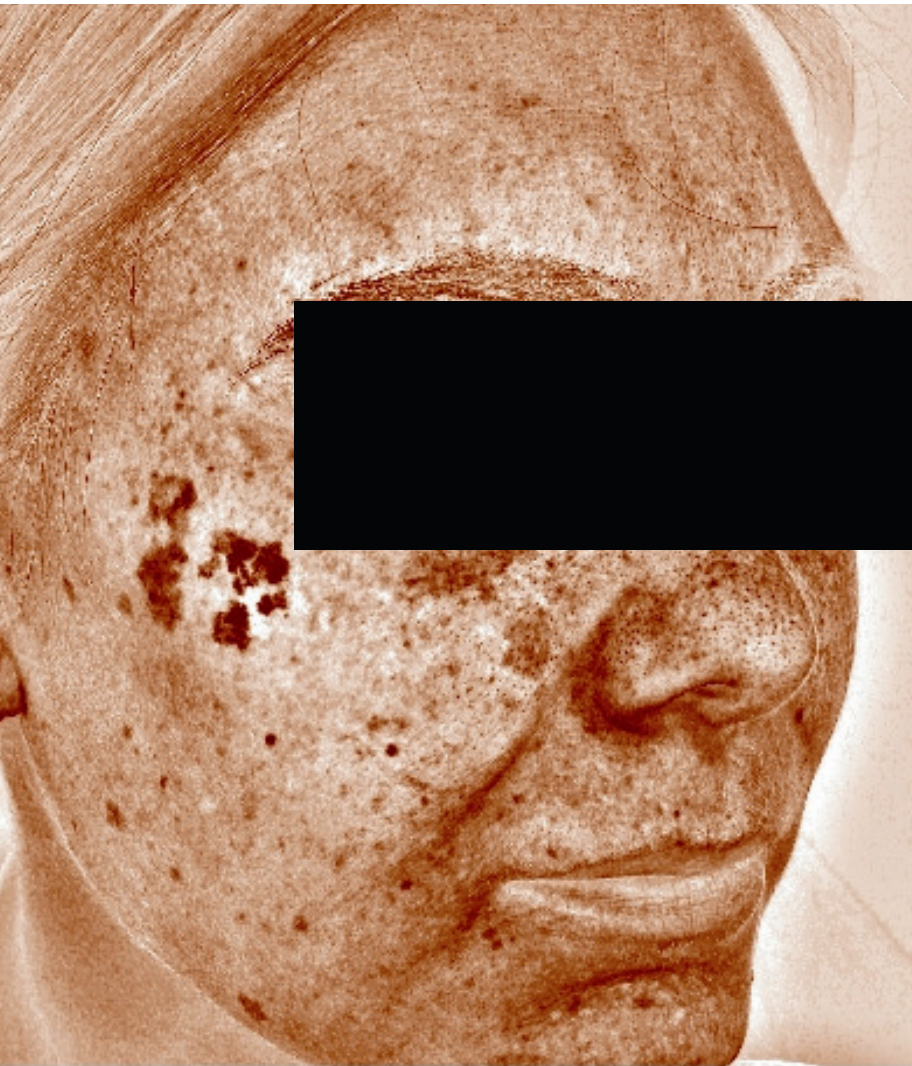

BEFORE TREATMENT

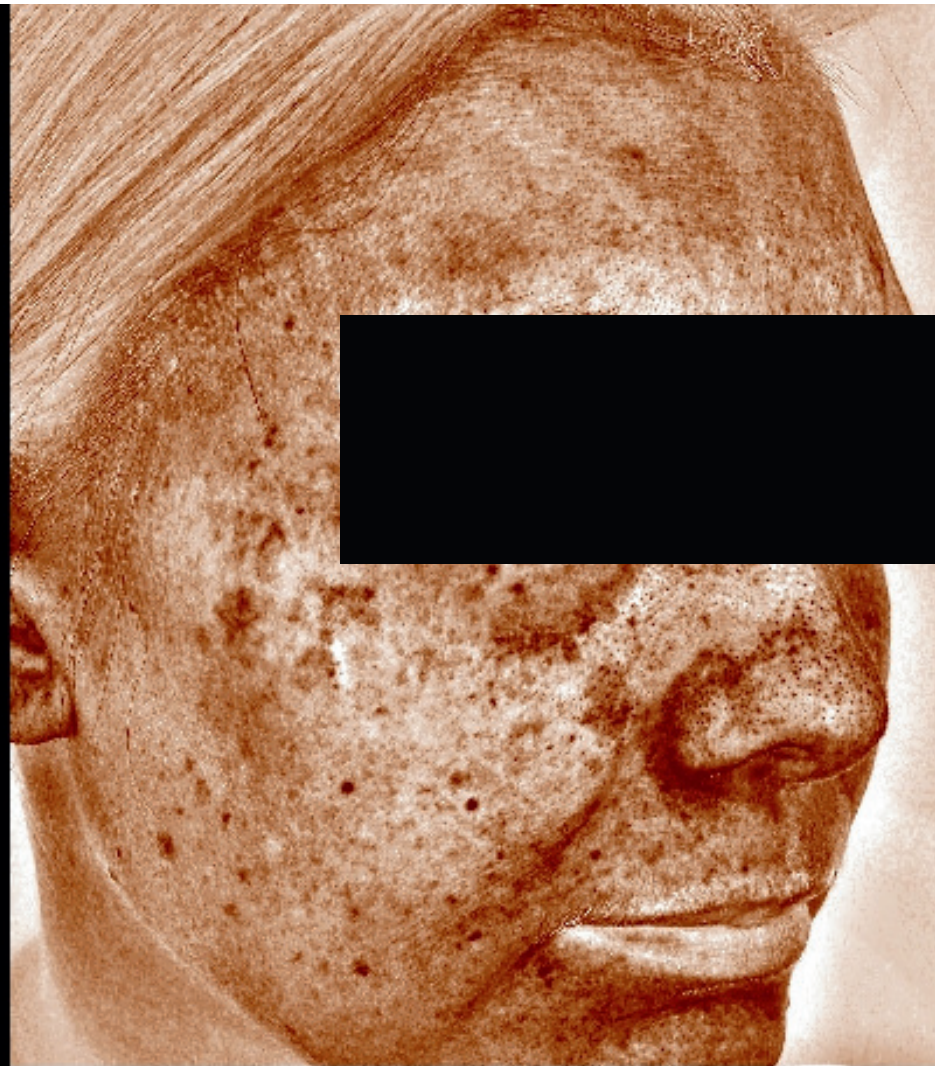

AFTER TREATMENT
